# Supplementary material for: Distal Gastrectomy for Symptomatic Stage IV Gastric Cancer Contributes to Prognosis with Acceptable Safety Compared to Gastrojejunostomy
Source: MDPI journal article supplement (doi:10.3390/cancers14020388), 2022-01-13
Supplement: s1 [file s1]

Supplementary Materials

# Distal Gastrectomy for Symptomatic Stage IV Gastric Cancer Contributes to Prognosis with Acceptable Safety Compared to Gastrojejunostomy

Nobuaki Fujikuni, Kazuaki Tanabe, Minoru Hattori, Yuji Yamamoto, Hirofumi Tazawa, Kazuhiro Toyota, Noriaki Tokumoto, Ryuichi Hotta, Senichiro Yanagawa, Yoshihiro Saeki, Yoichi Sugiyama, Masahiro Ikeda, Masayuki Shishida, Toshikatsu Fukuda, Keisuke Okano, Masahiro Nishihara, Hideki Ohdan  
and on behalf of Hiroshima Surgical study group of Clinical Oncology (HiSCO)

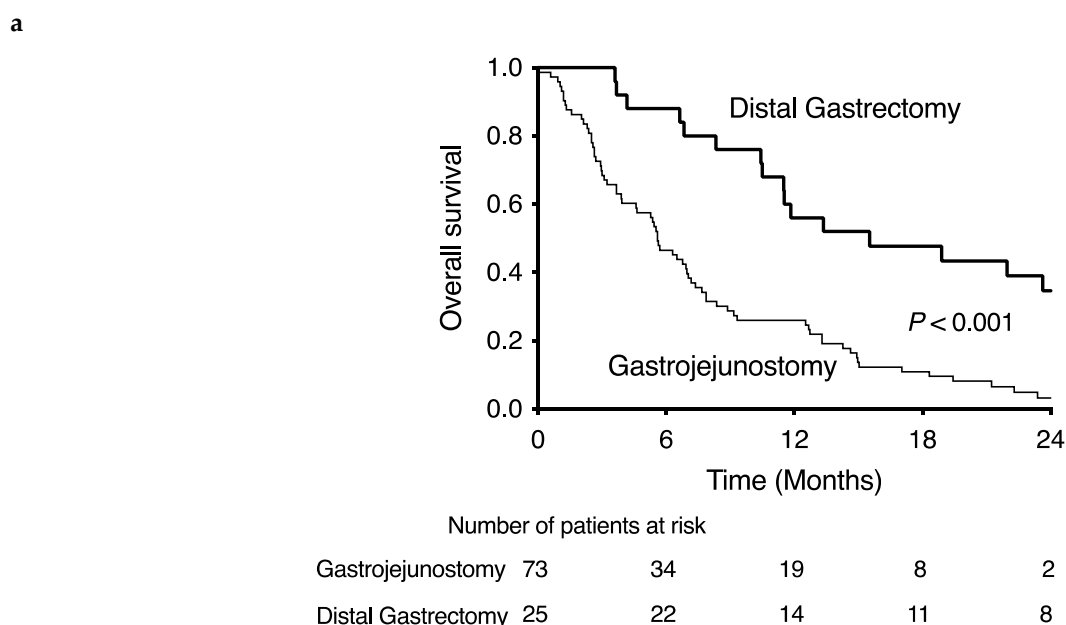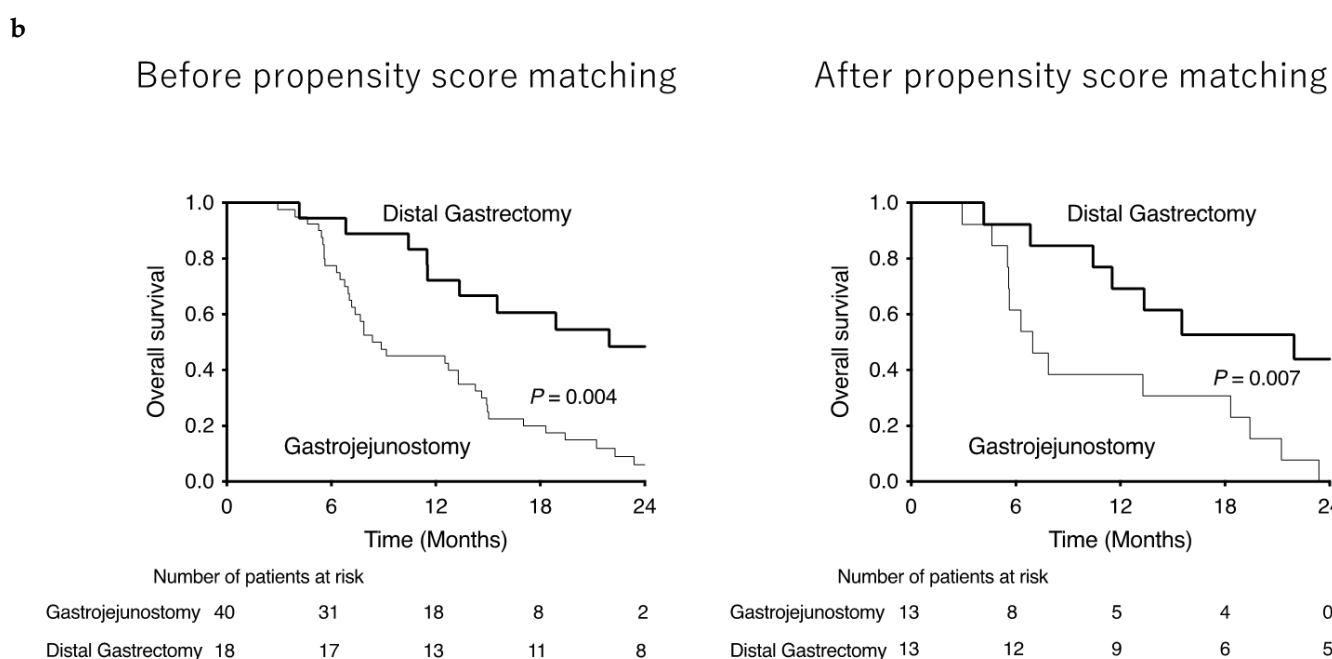

**c**

Before propensity score matching

After propensity score matching

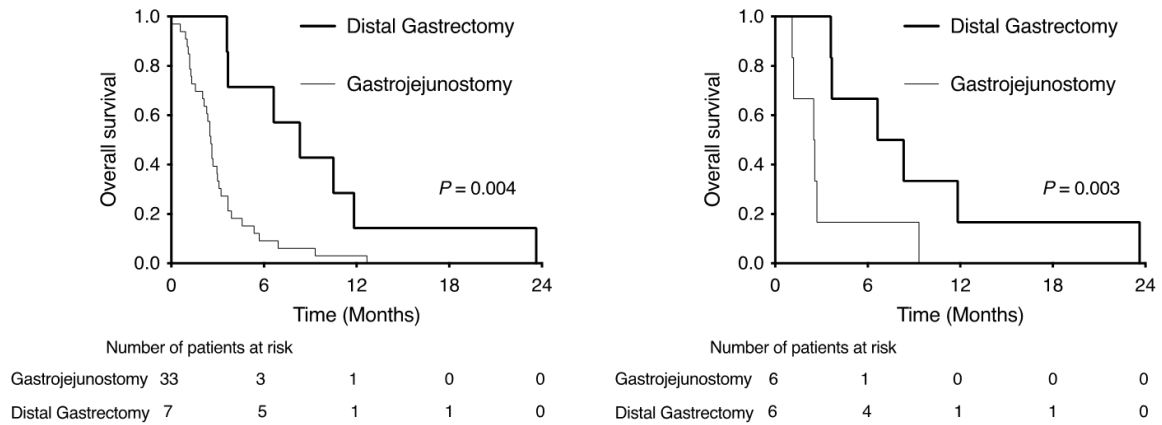

**Figure S1.** Kaplan–Meier survival curves of distal gastrectomy and gastrojejunostomy for stage IV gastric cancer with gastric outlet obstruction (a) all cases, (b) with chemotherapy and (c) without chemotherapy.

**Table S1.** General characteristics of 98 GC patients with gastric outlet obstruction.

| Variables   |         | Distal gastrectomy<br>(n = 25) | Gastrojejunostomy<br>(n = 73) | p-value |
|-------------|---------|--------------------------------|-------------------------------|---------|
| Age         | < 70    | 10 (40.0%)                     | 26 (35.6%)                    | 0.811   |
|             | ≥ 70    | 15 (50.0%)                     | 47 (64.4%)                    |         |
| Sex         | Male    | 16 (64.0%)                     | 49 (67.1%)                    | 0.809   |
|             | Female  | 9 (36.0%)                      | 24 (32.9%)                    |         |
| BMI         | < 25    | 21 (84.0%)                     | 65 (89.0%)                    | 0.725   |
|             | ≥ 25    | 4 (16.0%)                      | 8 (11.0%)                     |         |
| ASA PS      | 1       | 0 (0%)                         | 2 (2.7%)                      | 0.309   |
|             | 2       | 20 (80.0%)                     | 48 (65.8%)                    |         |
|             | 3       | 5 (20.0%)                      | 23 (31.5%)                    |         |
| PS          | 0       | 12 (48.0%)                     | 42 (57.5%)                    | 0.336   |
|             | 1       | 10 (40.0%)                     | 16 (21.9%)                    |         |
|             | 2       | 2 (8.0%)                       | 10 (13.7%)                    |         |
|             | 3       | 1 (4.0%)                       | 5 (6.8%)                      |         |
| Anemia      | Present | 12 (48.0%)                     | 44 (60.3%)                    | 0.351   |
|             | Absent  | 13 (52.0%)                     | 29 (39.7%)                    |         |
| Obstruction | Present | 25 (100.0%)                    | 73 (100.0%)                   |         |
| CEA         | < 5     | 18 (72.0%)                     | 38 (52.8%)                    | 0.106   |
|             | ≥ 5     | 7 (28.0%)                      | 34 (47.2%)                    |         |
|             | unknown |                                | 1                             |         |
| CA19-9      | < 37    | 14 (58.3%)                     | 43 (59.7%)                    | 1.000   |
|             | ≥ 37    | 10 (41.7%)                     | 29 (40.3%)                    |         |
|             | unknown | 1                              | 1                             |         |
| NLR         | < 3     | 17 (68.0%)                     | 21 (28.8%)                    | <0.001  |

|                               |              |               |              |                  |
|-------------------------------|--------------|---------------|--------------|------------------|
|                               | ≥ 3          | 8 (32.0%)     | 52 (71.2%)   |                  |
| PNI                           | < 40         | 10 (40.0%)    | 43 (58.9%)   | 0.111            |
|                               | ≥ 40         | 15 (60.0%)    | 30 (41.1%)   |                  |
| mGPS                          | 0            | 7 (33.3%)     | 14 (20.0%)   | 0.241            |
|                               | 1–2          | 14 (66.7%)    | 56 (80.0%)   |                  |
|                               | unknown      | 4             | 3            |                  |
| Macroscopic Type              | Non-4        | 21 (84.0%)    | 60 (82.2%)   | 1.000            |
|                               | 4            | 4 (16.0%)     | 13 (17.8%)   |                  |
| Histologic type               | Intestinal   | 8 (32.0%)     | 26 (35.6%)   | 0.812            |
|                               | Diffuse      | 17 (68.0%)    | 47 (64.4%)   |                  |
| Invasion of adjacent organs   | Present      | 1 (4.0%)      | 8 (11.0%)    | 0.441            |
|                               | Absent       | 24 (96.0%)    | 65 (89.0%)   |                  |
| Distant lymph node metastasis | Present      | 3 (12.0%)     | 25 (34.2%)   | <b>0.041</b>     |
|                               | Absent       | 22 (88.0%)    | 48 (65.8%)   |                  |
| Liver metastasis              | Present      | 7 (28.0%)     | 19 (26.0%)   | 1.000            |
|                               | Absent       | 18 (72.0%)    | 54 (74.0%)   |                  |
| Peritoneal metastasis         | Present      | 17 (68.0%)    | 54 (74.0%)   | 0.608            |
|                               | Absent       | 8 (32.0%)     | 19 (26.0%)   |                  |
| Number of metastasis factors  | 1            | 20 (80.0%)    | 44 (60.3%)   | 0.312            |
|                               | 2            | 4 (16.0%)     | 22 (30.1%)   |                  |
|                               | 3            | 1 (4.0%)      | 4 (5.5%)     |                  |
|                               | 4            | 0             | 3 (4.1%)     |                  |
| Postoperative Chemotherapy    | Present      | 18 (72.0%)    | 40 (54.8%)   | 0.161            |
|                               | Absent       | 7 (28.0%)     | 33 (45.2%)   |                  |
| Surgical approach             | Open         | 21 (84.0%)    | 56 (76.7%)   | 0.577            |
|                               | Laparoscopic | 4 (16.0%)     | 17 (23.3%)   |                  |
| Operative time                | (min)        | 231 (118–366) | 125 (61–268) | <b>&lt;0.001</b> |
| Blood loss                    | (ml)         | 85 (10–680)   | 10 (0–555)   | <b>&lt;0.001</b> |
| Hospital stays                | (days)       | 13 (9–138)    | 17 (1–72)    | 0.974            |
| Complications ≥CD3            | Present      | 2 (8.0%)      | 7 (9.6%)     | 1.000            |
|                               | Absent       | 23 (92.0%)    | 66 (90.4%)   |                  |

Variables in bold are statistically significant ( $p < 0.05$ ). BMI, body mass index; ASA PS, American Society of Anesthesiologists physical status; PS, Performance Status; CEA, carcinoembryonic antigen; CA19-9, carbohydrate antigen 19-9; NLR, neutrophil-to-lymphocyte ratio; PNI, prognostic nutritional index; mGPS, modified Glasgow Prognostic Score; CD, Clavien-Dindo Classification.

**Table S2.** Univariate and multivariate analysis of overall survival of 98 GC patients with gastric outlet obstruction.

| Variables                     |                    | Univariate          | <i>p</i> -value  | Multivariate        | <i>p</i> -value  |
|-------------------------------|--------------------|---------------------|------------------|---------------------|------------------|
|                               |                    | HR (95%CI)          |                  | HR (95%CI)          |                  |
| Age                           | < 70               | 1                   |                  |                     |                  |
|                               | ≥ 70               | 1.518 (0.992–2.324) | 0.054            |                     |                  |
| Sex                           | Male               | 1                   |                  |                     |                  |
|                               | Female             | 1.510 (0.974–2.342) | 0.066            |                     |                  |
| BMI                           | < 25               | 1                   |                  |                     |                  |
|                               | ≥ 25               | 0.737 (0.391–1.388) | 0.344            |                     |                  |
| ASA PS                        | 1–2                | 1                   |                  |                     |                  |
|                               | 3                  | 1.901 (1.207–2.995) | <b>0.006</b>     | 1.420 (0.872–2.312) | 0.159            |
| PS                            | 0                  | 1                   |                  |                     |                  |
|                               | 1–3                | 1.631 (1.081–2.462) | <b>0.020</b>     | 0.724 (0.406–1.292) | 0.274            |
| Anemia                        | Present            | 1.112 (0.735–1.681) | 0.615            |                     |                  |
|                               | Absent             | 1                   |                  |                     |                  |
| CEA                           | < 5                | 1                   |                  |                     |                  |
|                               | ≥ 5                | 1.212 (0.800–1.834) | 0.364            |                     |                  |
| CA19-9                        | < 37               | 1                   |                  |                     |                  |
|                               | ≥ 37               | 1.214 (0.792–1.862) | 0.373            |                     |                  |
| NLR                           | < 3                | 1                   |                  |                     |                  |
|                               | ≥ 3                | 1.959 (1.267–3.028) | <b>0.002</b>     | 1.397 (0.817–2.387) | 0.222            |
| PNI                           | < 40               | 1                   |                  |                     |                  |
|                               | ≥ 40               | 0.583 (0.382–0.890) | <b>0.012</b>     | 0.710 (0.437–1.153) | 0.166            |
| mGPS                          | 0                  | 1                   |                  |                     |                  |
|                               | 1–2                | 1.581 (0.941–2.657) | 0.084            |                     |                  |
| Macroscopic type              | Non-4              | 1                   |                  |                     |                  |
|                               | 4                  | 0.918 (0.541–1.556) | 0.750            |                     |                  |
| Histologic type               | Intestinal         | 1                   |                  |                     |                  |
|                               | Diffuse            | 1.092 (0.710–1.680) | 0.687            |                     |                  |
| Invasion of adjacent organs   | Present            | 0.901 (0.448–1.813) |                  |                     |                  |
|                               | Absent             | 1                   | 0.770            |                     |                  |
| Distant lymph node metastasis | Present            | 1.259 (0.801–1.980) | 0.317            |                     |                  |
|                               | Absent             | 1                   |                  |                     |                  |
| Liver metastasis              | Present            | 0.916 (0.573–1.464) | 0.713            |                     |                  |
|                               | Absent             | 1                   |                  |                     |                  |
| Peritoneal metastasis         | Present            | 1.564 (0.979–2.498) | 0.061            |                     |                  |
|                               | Absent             | 1                   |                  |                     |                  |
| Number of metastasis factors  | 1                  | 1                   |                  |                     |                  |
|                               | 2–4                | 1.461 (0.955–2.236) | 0.081            |                     |                  |
| Postoperative Chemotherapy    | Present            | 0.201 (0.127–0.317) | <b>&lt;0.001</b> | 0.168 (0.088–0.319) | <b>&lt;0.001</b> |
|                               | Absent             | 1                   |                  |                     |                  |
| Surgical approach             | Open               | 1                   |                  |                     |                  |
|                               | Laparoscopic       | 1.718 (1.046–2.823) | <b>0.033</b>     | 1.148 (0.666–1.980) | 0.619            |
| Surgical                      | Distal Gastrectomy | 0.383 (0.233–0.629) | <b>&lt;0.001</b> | 0.371 (0.211–0.651) | <b>&lt;0.001</b> |

|                       |                   |                     |              |                      |              |
|-----------------------|-------------------|---------------------|--------------|----------------------|--------------|
| procedure             | Gastrojejunostomy | 1                   |              |                      |              |
| Operative time        | < 134             | 1                   |              |                      |              |
|                       | ≥ 134             | 0.857 (0.571–1.286) | 0.455        |                      |              |
| Blood loss            | < 20              | 1                   |              |                      |              |
|                       | ≥ 20              | 0.880 (0.584–1.325) | 0.540        |                      |              |
| Hospital stays        | < 16              | 1                   |              |                      |              |
|                       | ≥ 16              | 1.883 (1.237–2.865) | <b>0.003</b> | 1.722 (1.055–2.810)) | <b>0.030</b> |
| Complications<br>≥CD3 | Present           | 1.574 (0.787–3.146) | 0.200        |                      |              |
|                       | Absent            | 1                   |              |                      |              |

HR, hazard ratio; CI, confidential index. Variables in bold are statistically significant ( $p < 0.05$ ).

**Table S3.** General characteristics before propensity score matching of 98 GC patients with gastric outlet obstruction.

|             |         | With chemotherapy     |                   |                 | Without chemotherapy  |                   |                 |
|-------------|---------|-----------------------|-------------------|-----------------|-----------------------|-------------------|-----------------|
| Variables   |         | Distal<br>gastrectomy | Gastrojejunostomy | <i>p</i> -value | Distal<br>gastrectomy | Gastrojejunostomy | <i>p</i> -value |
|             |         | ( <i>n</i> = 18)      | ( <i>n</i> = 40)  |                 | ( <i>n</i> = 7)       | ( <i>n</i> = 33)  |                 |
| Age         | < 70    | 9 (50.0%)             | 17 (42.5%)        | 0.402           | 1 (14.3%)             | 9 (27.3%)         | 0.656           |
|             | ≥ 70    | 9 (50.0%)             | 23 (57.5%)        |                 | 6 (85.7%)             | 24 (72.7%)        |                 |
| Sex         | Male    | 14 (74.8%)            | 29 (72.5%)        | 0.756           | 2 (28.6%)             | 20 (60.6%)        | 0.211           |
|             | Female  | 4 (22.2%)             | 11 (27.5%)        |                 | 5 (71.4%)             | 13 (39.4%)        |                 |
| BMI         | < 25    | 15 (83.3.3%)          | 35 (87.5%)        | 0.694           | 6 (85.7%)             | 30 (90.9%)        | 1.000           |
|             | ≥ 25    | 3 (16.7%)             | 5 (12.5%)         |                 | 1 (14.3%)             | 3 (9.1%)          |                 |
| ASA PS      | 1       | 0 (0%)                | 1 (2.5%)          | 0.519           | 0 (0%)                | 1 (3.0%)          | 1.000           |
|             | 2       | 16 (88.9%)            | 29 (72.5%)        |                 | 4 (57.1%)             | 19 (57.6%)        |                 |
|             | 3       | 2 (11.1%)             | 10 (25.0%)        |                 | 3 (42.9%)             | 13 (39.4%)        |                 |
| PS          | 0       | 10 (55.6%)            | 33 (82.2%)        | 0.072           | 2 (28.6%)             | 9 (27.3%)         | 0.942           |
|             | 1       | 7 (38.9%)             | 5 (12.5%)         |                 | 3 (42.9%)             | 11 (33.3%)        |                 |
|             | 2       | 1 (5.6%)              | 2 (5.0%)          |                 | 1 (14.3%)             | 8 (24.2%)         |                 |
|             | 3       | 0 (0%)                | 0 (0%)            |                 | 1 (14.3%)             | 5 (15.2%)         |                 |
| Anemia      | Present | 9 (50.0%)             | 20 (50.0%)        | 1.000           | 3 (42.9%)             | 24 (72.7%)        | 0.187           |
|             | Absent  | 9 (50.0%)             | 20 (50.0%)        |                 | 4 (57.1%)             | 9 (27.3%)         |                 |
| Obstruction | Present | 18 (100.0%)           | 40 (100.0%)       | -               | 7 (100.0%)            | 33 (100%)         | -               |
|             | Absent  | 0                     | 0                 |                 | 0                     | 0                 |                 |
| CEA         | < 5     | 14 (77.8%)            | 22 (56.4%)        | 0.149           | 4 (57.1%)             | 16 (48.5%)        | 1.000           |
|             | ≥ 5     | 4 (22.2%)             | 17 (43.6%)        |                 | 3 (42.9%)             | 17 (51.5%)        |                 |
|             | unknown | 0                     | 1                 |                 | 0                     | 0                 |                 |
| CA19-9      | < 37    | 11 (64.7%)            | 23 (59.0%)        | 0.772           | 3 (42.9%)             | 20 (66.6%)        | 0.432           |
|             | ≥ 37    | 6 (35.3%)             | 16 (41.0%)        |                 | 4 (57.1%)             | 13 (39.4%)        |                 |
|             | unknown | 1                     | 1                 |                 | 0                     | 0                 |                 |
| NLR         | < 3     | 11 (61.1%)            | 16 (40.0%)        | 0.163           | 6 (85.7%)             | 5 (15.2%)         | <0.001          |
|             | ≥ 3     | 7 (38.9%)             | 24 (60.0%)        |                 | 1 (14.3%)             | 28 (84.8%)        |                 |
| PNI         | < 40    | 6 (33.3%)             | 22 (55.0%)        | 0.161           | 4 (57.1%)             | 21 (63.6%)        | 1.000           |
|             | ≥ 40    | 12 (66.7%)            | 18 (45.0%)        |                 | 3 (42.9%)             | 12 (36.4%)        |                 |
| mGPS        | 0       | 5 (35.7%)             | 7 (18.9%)         | 0.272           | 2 (28.6%)             | 7 (21.2%)         | 1.000           |
|             | 1–2     | 9 (64.3%)             | 30 (81.1%)        |                 | 5 (71.4%)             | 26 (78.8%)        |                 |

|                               | unknown      | 4          | 3          |              | 0         | 0          |       |
|-------------------------------|--------------|------------|------------|--------------|-----------|------------|-------|
| Macroscopic type              | Non-4        | 16 (88.9%) | 32 (80.0%) | 0.483        | 5 (71.4%) | 28 (84.8%) | 0.584 |
|                               | 4            | 2 (11.1%)  | 8 (20.0%)  |              | 2 (28.6%) | 5 (15.2%)  |       |
| Histologic type               | Intestinal   | 6 (33.3%)  | 13 (32.5%) | 1.000        | 2 (28.6%) | 13 (39.4%) | 0.691 |
|                               | Diffuse      | 12 (66.7%) | 27 (67.5%) |              | 5 (71.4%) | 20 (60.6%) |       |
| Invasion of adjacent organs   | Present      | 1 (5.6%)   | 4 (10.0%)  | 0.670        | 0 (0%)    | 4 (12.1%)  | 0.582 |
|                               | Absent       | 17 (94.4%) | 36 (90.0%) |              | 7 (100%)  | 29 (87.9%) |       |
| Distant lymph node metastasis | Present      | 2 (11.1%)  | 17 (42.5%) | <b>0.032</b> | 1 (14.3%) | 8 (24.2%)  | 0.672 |
|                               | Absent       | 16 (88.9%) | 23 (57.5%) |              | 6 (85.7%) | 25 (75.8%) |       |
| Liver metastasis              | Present      | 5 (27.8%)  | 11 (27.5%) | 1.000        | 2 (28.6%) | 8 (24.2%)  | 1.000 |
|                               | Absent       | 13 (72.2%) | 29 (72.5%) |              | 5 (71.4%) | 25 (75.8%) |       |
| Peritoneal metastasis         | Present      | 12 (66.7%) | 26 (65.0%) | 1.000        | 5 (71.4%) | 28 (84.8%) | 0.584 |
|                               | Absent       | 6 (33.3%)  | 14 (35.0%) |              | 2 (28.6%) | 5 (15.2%)  |       |
| Number of metastasis factors  | 1            | 15 (83.3%) | 24 (60.0%) | 0.319        | 5 (71.4%) | 20 (60.6%) | 0.478 |
|                               | 2            | 3 (16.7%)  | 12 (30.0%) |              | 1 (14.3%) | 10 (30.3%) |       |
|                               | 3            | 0 (0%)     | 3 (7.5%)   |              | 1 (14.3%) | 1 (3.0%)   |       |
|                               | 4            | 0 (0%)     | 1 (2.5%)   |              | 0         | 2 (6.1%)   |       |
| Surgical approach             | Open         | 18 (100%)  | 32 (80.0%) | 0.093        | 3 (42.9%) | 24 (72.7%) | 0.187 |
|                               | Laparoscopic | 0 (0%)     | 8 (20.0%)  |              | 4 (57.1%) | 9 (27.3%)  |       |

Variables in bold are statistically significant ( $p < 0.05$ ).

**Table S4.** General characteristics after propensity score matching of 98 GC patients with gastric outlet obstruction.

| With chemotherapy |         |                    |                   |                 | Without chemotherapy |                   |                 |
|-------------------|---------|--------------------|-------------------|-----------------|----------------------|-------------------|-----------------|
| Variables         |         | Distal gastrectomy | Gastrojejunostomy | <i>p</i> -value | Distal gastrectomy   | Gastrojejunostomy | <i>p</i> -value |
|                   |         | ( <i>n</i> = 13)   | ( <i>n</i> = 13)  |                 | ( <i>n</i> = 6)      | ( <i>n</i> = 6)   |                 |
| Age               | < 70    | 5 (38.5%)          | 5 (38.5%)         | 1.000           | 0 (0%)               | 1 (16.7%)         | 1.000           |
|                   | ≥ 70    | 8 (61.5%)          | 8 (61.5%)         |                 | 6 (100%)             | 5 (83.3%)         |                 |
| Sex               | Male    | 10 (76.9%)         | 9 (69.2%)         | 1.000           | 1 (16.7%)            | 4 (66.7%)         | 0.242           |
|                   | Female  | 3 (23.1%)          | 4 (30.8%)         |                 | 5 (83.3%)            | 2 (33.3%)         |                 |
| BMI               | < 25    | 11 (84.6%)         | 12 (92.3%)        | 1.000           | 5 (83.3%)            | 5 (83.3%)         | 1.000           |
|                   | ≥ 25    | 2 (15.4%)          | 1 (7.2%)          |                 | 1 (16.7%)            | 1 (16.7%)         |                 |
| ASA PS            | 1       | 0 (0%)             | 0 (0%)            | 1.000           | 0 (0%)               | 1 (16.7%)         | 0.393           |
|                   | 2       | 11 (84.6%)         | 12 (92.3%)        |                 | 4 (66.7%)            | 2 (33.3%)         |                 |
|                   | 3       | 2 (15.4%)          | 1 (7.7%)          |                 | 2 (33.3%)            | 3 (50.0%)         |                 |
| PS                | 0       | 7 (53.8%)          | 11 (84.6%)        | 0.169           | 1 (16.7%)            | 0                 | 0.757           |
|                   | 1       | 5 (38.5%)          | 1 (7.7%)          |                 | 3 (50.0%)            | 4 (66.7%)         |                 |
|                   | 2       | 1 (7.7%)           | 1 (7.7%)          |                 | 1 (16.7%)            | 1 (16.7%)         |                 |
|                   | 3       | 0 (0%)             | 0 (0%)            |                 | 2 (33.3%)            | 1 (16.7%)         |                 |
| Anemia            | Present | 8 (61.5%)          | 8 (61.5%)         | 1.000           | 2 (33.3%)            | 4 (66.7%)         | 0.567           |
|                   | Absent  | 5 (38.5%)          | 5 (38.5%)         |                 | 4 (66.7%)            | 2 (33.3%)         |                 |
| Obstruction       | Present | 13 (100.0%)        | 13 (100.0%)       | -               | 6 (100.0%)           | 6 (100.0%)        | -               |

|                               | Absent       | 0          | 0          |       | 0          | 0          |       |
|-------------------------------|--------------|------------|------------|-------|------------|------------|-------|
| CEA                           | < 5          | 10 (76.9%) | 5 (38.5%)  | 0.111 | 4 (66.7%)  | 2 (33.3%)  | 0.567 |
|                               | ≥ 5          | 3 (23.1%)  | 8 (61.5%)  |       | 2 (33.3%)  | 4 (66.7%)  |       |
| CA19-9                        | < 37         | 10 (76.9%) | 7 (53.8%)  | 0.411 | 3(50.0%)   | 3 (50.0%)  | 1.000 |
|                               | ≥ 37         | 3 (23.1%)  | 6 (46.2%)  |       | 3(50.0%)   | 3 (50.0%)  |       |
| NLR                           | < 3          | 9 (69.2%)  | 5 (38.5%)  | 0.238 | 5 (83.3%)  | 5 (83.3%)  | 1.000 |
|                               | ≥ 3          | 4 (30.8%)  | 8 (61.5%)  |       | 1 (16.7%)  | 1 (16.7%)  |       |
| PNI                           | < 40         | 5 (38.5%)  | 8 (61.5%)  | 0.434 | 3(50.0%)   | 2 (33.3%)  | 1.000 |
|                               | ≥ 40         | 8 (61.5%)  | 5 (38.5%)  |       | 3(50.0%)   | 4 (66.7%)  |       |
| mGPS                          | 0            | 5 (38.5%)  | 2 (15.4%)  | 0.378 | 2(33.3%)   | 1 (16.7%)  | 1.000 |
|                               | 1–2          | 8 (61.5%)  | 11 (84.6%) |       | 4 (66.7%)  | 5 (83.3%)  |       |
| Macroscopic type              | Non-4        | 12 (92.3%) | 10 (76.9%) | 0.593 | 4 (66.7%)  | 5 (83.3%)  | 1.000 |
|                               | 4            | 1 (7.7%)   | 3 (23.1%)  |       | 2(33.3%)   | 1 (16.7%)  |       |
| Histologic type               | Intestinal   | 4 (30.8%)  | 4 (30.8%)  | 1.000 | 1 (16.7%)  | 0          | 1.000 |
|                               | Diffuse      | 9 (69.2%)  | 9 (69.2%)  |       | 5 (83.3%)  | 6 (100.0%) |       |
| Invasion of adjacent organs   | Present      | 1 (7.7%)   | 2 (15.4)   | 1.000 | 0          | 2 (33.3%)  | 0.455 |
|                               | Absent       | 12 (92.3%) | 11 (84.6%) |       | 6 (100.0%) | 4 (66.7%)  |       |
| Distant lymph node metastasis | Present      | 2 (15.4%)  | 2 (15.4%)  | 1.000 | 1 (16.7%)  | 2 (33.3%)  | 1.000 |
|                               | Absent       | 11 (84.6%) | 11 (84.6%) |       | 5 (83.3%)  | 4 (66.7%)  |       |
| Liver metastasis              | Present      | 3 (23.1%)  | 5 (38.5%)  | 0.673 | 1 (16.7%)  | 1 (16.7%)  | 1.000 |
|                               | Absent       | 10 (76.9%) | 8 (61.5%)  |       | 5 (83.3%)  | 5 (83.3%)  |       |
| Peritoneal metastasis         | Present      | 8 (61.5%)  | 9 (69.2%)  | 1.000 | 5 (83.3%)  | 4 (66.7%)  | 1.000 |
|                               | Absent       | 5 (38.5%)  | 4 (30.8%)  |       | 1 (16.7%)  | 2 (33.3%)  |       |
| Number of metastasis factors  | 1            | 11 (84.6%) | 9 (69.2%)  | 0.497 | 4 (66.7%)  | 3 (50.0%)  | 0.480 |
|                               | 2            | 2 (15.4%)  | 3 (23.1%)  |       | 1 (16.7%)  | 2 (33.3%)  |       |
|                               | 3            | 0 (0%)     | 0 (0%)     |       | 1 (16.7%)  | 0          |       |
|                               | 4            | 0 (0%)     | 1 (7.7%)   |       | 0          | 1 (16.7%)  | 1.000 |
| Surgical approach             | Open         | 13 (100%)  | 11 (84.6%) | 0.480 | 3 (50.0%)  | 4 (66.7%)  |       |
|                               | Laparoscopic | 0          | 2 (15.4%)  |       | 3 (50.0%)  | 2 (33.3%)  |       |
